Title: Silencing of a unique integrated domain nucleotide-binding leucine-rich repeat gene in wheat abolishes *Diuraphis noxia* resistance.

Short title: An NLR-ID functioning in *D. noxia* resistant wheat

Vittorio Nicolis

Department of Botany and Plant Biotechnology, University of Johannesburg, Auckland Park,  
Johannesburg, 2006, South Africa

Eduard Venter

Department of Botany and Plant Biotechnology, University of Johannesburg, Auckland Park,  
Johannesburg, 2006, South Africa

Corresponding author:

Eduard Venter

Department of Botany and Plant Biotechnology

University of Johannesburg

P.O. Box 524

Auckland Park

Johannesburg

2006

South Africa

Email: [eduardv@uj.ac.za](mailto:eduardv@uj.ac.za)

Tel no.: +27-11-559-3911

1 Silencing of a unique integrated domain nucleotide-binding leucine-rich repeat gene in wheat  
2 abolishes *Diuraphis noxia* resistance.

3

4 Vittorio Nicolis, and Eduard Venter\*

5

6 Department of Botany and Plant Biotechnology, University of Johannesburg, Auckland Park,

7 Johannesburg, 2006, South Africa

8

9

## 10 **Abstract**

11 Plants respond in a similar manner to aphid feeding as to pathogen attack. *Diuraphis noxia* is  
12 a specialist aphid, feeding only on selected grasses that include wheat, barley, and oats. The  
13 wheat-*Diuraphis noxia* interaction is characterized by very similar responses as seen in wheat-  
14 pathogen interactions with none of the underlying resistance pathways and genes characterized  
15 yet. From wheat harboring the *Dn1* resistance gene, we have identified a nucleotide-binding  
16 leucine-rich repeat (NLR) gene containing two integrated domains (IDs). These are three C-  
17 terminus ankyrin repeat-domains and an N-terminus WRKY domain. The NLR core of the  
18 gene can be traced through speciation events within the grass family, with a recent WRKY  
19 domain integration that is *Triticum* specific. Virus induced gene silencing of the gene in  
20 resistant wheat lines resulted in the abolishment of localized cell death. Silenced plants  
21 supported a higher number of aphids similar to the susceptible NIL and the intrinsic rate of  
22 increase of the aphids matched that of aphids feeding on the susceptible NIL. The presence of  
23 the gene is necessary for *Dn1* resistance and we have named the gene *Associated with Dn*  
24 *resistance 1 (Adr1)* to reflect this function.

25 Introduction

26

27 The Russian wheat aphid (*Diuraphis noxia* Kurdjumov) is a specialist aphid pest of grasses. Its  
28 primary hosts with commercial importance are wheat, barley, and oats, while it can survive  
29 well on false barley, wild oats, and rescue grass (Jankielsohn 2013). After introduction and  
30 escalation into a pest, *D. noxia* causes tremendous losses in wheat production countries  
31 (Morrison and Pears 1998). Resistant wheat cultivar development resulted in lower yield  
32 losses being incurred, but also increased pressure on the aphids to develop new biotypes. To  
33 date twelve resistance genes (*Dn*-genes) have been identified and employed in developing  
34 resistant cultivars. Several of these genes were incorporated into resistant wheat lines in South  
35 Africa and this has led to the development of at least four known aphid biotypes (RWASA1 –  
36 4) that overcame all but the *Dn7* resistance gene (Jankielsohn 2016). The *Dn1* resistance gene,  
37 effective against RWASA1, has an antibiotic effect against the aphids and limits their  
38 fecundity, growth and longevity (Smith et al. 1992). This gene was the first gene to be  
39 implemented in resistant wheat breeding and maps to chromosome 7DS (Bierman 2015). The  
40 gene has yet to be identified or cloned and the mechanism by which it contributes resistance is  
41 not clear.

42

43 Plants under attack by phloem feeding insects respond similarly to attack by pathogens (Bos et  
44 al. 2010; Rodriguez and Bos 2013). *Diuraphis noxia* feeding progresses through probing on  
45 the leaf surface, intercellular stylet navigation and finally, penetration into the phloem to feed.  
46 During the intercellular phase the stylet occasionally pierces cells for the aphid to sense its  
47 way. During transition through the leaf, the stylet is protected by the production of a salivary  
48 sheath that encloses the stylet. This sheath consists of saliva that solidifies once it is secreted  
49 from the stylet tip. Once the stylet reaches the phloem the aphid starts to produce watery saliva

50 that assists in feeding and that contains effector molecules that interfere with the plant's defense  
51 responses (Bos et al. 2010; Lapitan et al. 2007; Rodriguez and Bos 2013; Will et al. 2007).  
52 Indeed, it has been shown by Lapitan et al. (2007) that the injection of proteins from different  
53 salivary fractions induces symptoms in a susceptible cultivar. This included chlorosis  
54 visualized as chlorotic lesions and streaking, leaf rolling, and stunted growth. In contrast, the  
55 resistance response is likened to the classic gene-for-gene interaction mediated by an *R*-gene  
56 with hypersensitive-linked necrotic lesions observed at the site of aphid feeding (Botha et al.  
57 2005).

58

59 Nucleotide-binding leucine-rich repeat (NLR) genes often work as dimers to form receptor  
60 complexes to specify resistance against a pathogen (Sinapidou et al. 2004). In cereals, several  
61 NLR-complex receptors have been identified, with Lr10 and RGA2 the first identified from  
62 wheat (Loutre et al. 2009). Studies on rice blast resistance alleles indicated that resistance is  
63 imparted by a combination of two genes located at the same locus, e.g. the *Pikm* and *Pia* loci  
64 (Ashikawa et al. 2008; Okuyama et al. 2011). Thus, interaction between NLRs are indicative  
65 of a complex avirulence effector-recognition system that plants employ during innate  
66 immunity. Interaction between NLRs to provide resistance can include up to three proteins  
67 working in conjunction as seen in barley resistance against *P. graminis*. Here, the NLRs *rpg4*  
68 functions together with *Rpg5*, *HvRga1*, and *HvAdf3*, an actin-depolymerizing factor-like gene  
69 (Wang et al. 2013). RPG5 contains an additional serine/threonine protein kinase domain that  
70 could implicate this NLR in signal transduction. Thus, pathogen recognition by the  
71 RPG5/HvRGA1 complex may initialize signal transduction by the phosphorylation of  
72 serine/threonine protein kinase domains (Wang et al. 2013). This was postulated after the  
73 observation that the RPG1 resistance gene in barley contains a similar serine/threonine protein  
74 kinase domain that is rapidly phosphorylated in the resistant line, against *P. graminis* f. sp.

75 *tritici*, but not in the susceptible line (Nirmala et al. 2010). This domain could also be targeted  
76 by the rust effector and is guarded by the NLRs that are bound to it. Decoy domain recognition  
77 has been demonstrated by Sarris et al. (2015) and Le Roux et al. (2015) where the RPS4/RRS1  
78 dimer interacts directly with effectors, PopP2 and AvrRps4, via an integrated WRKY domain  
79 to induce a defense response.

80

81 Nucleotide-binding leucine-rich repeat genes that contain WRKY integrated domains (NLR-  
82 ID) at their C-terminus have been identified to act as decoy binding sites for interaction with  
83 effector proteins (Le Roux et al. 2015; Sarris et al 2015). RRS1-R and RPS4 impart resistance  
84 to *Arabidopsis* against *Ralstonia solanacearum* and *Pseudomonas syringae* pv. *pisi* (Sarris et  
85 al. 2015). PopP2 is an acetyltransferase that specifically acetylates the lysine residues located  
86 in the WRKYQK motif of RRS1 and other nuclear localized WRKY transcription factors that  
87 then interferes with their DNA binding capability. Thus, disabling transcription activation and  
88 subsequent defense responses. Acetylation disrupts the DNA binding of RRS1-R and in turn  
89 activates RPS4-dependent resistance by releasing the RRS1/RPS4 complex inducing innate  
90 immunity in *Arabidopsis*. Thus, turning the pathogen's effector against itself to induce innate  
91 immunity in the cell (Le Roux et al. 2015).

92

93 The identification of NLR-ID decoy proteins that dimerize to target effector proteins has  
94 furthered our understanding of the complexity of plant innate immunity against pathogens.  
95 Identification of a similar NLR-ID protein from wheat that is implicated in the defense response  
96 to *D. noxia*, has led us to functionally test the role that it plays in the wheat-*D. noxia* interaction.  
97 We hypothesized that *5AL-B4*, a C-terminal WRKY containing NLR-ID with additional N-  
98 terminal ankyrin repeats, plays a role during the innate immunity of wheat carrying the *Dn1*  
99 resistance gene against *D. noxia*. It is intriguing that *5AL-B4* contains integrated WRKY and

100 ankyrin domains, as ankyrin, WRKY10, -12, and -53 transcription factors have previously been  
101 associated with *D. noxia* resistance (Smith et al. 2010; Van Eck et al. 2010). Therefore, the  
102 aims were to further characterize *5AL-B4* and to use VIGS-mediated silencing to ascertain the  
103 role that *5AL-B4* plays during wheat interacting with *D. noxia*.

104

## 105 **Results**

106

107 *5AL-B4* homologs are genetically similar

108 TRIAE\_CS42\_5AL\_TGACv1\_374266\_AA1195550 (November 2014 *T. aestivum* Ensemble  
109 release; designated *5AL-B4*) is an NLR with similar architecture to NLR-ID decoys against  
110 pathogen effectors (Fig. 1). It shared homology with *Pi36* and identified as a possible role  
111 player in the wheat-*D. noxia* interaction from the study by Nicolis et al. (2017). The sequence  
112 and domain architecture for *5AL-B4* was predicted from cv. ‘Chinese Spring’, which has no  
113 resistance to *D. noxia*. PCR amplification and sequencing of *5AL-B4* from a *D. noxia*  
114 susceptible near isogenic line (NIL) Tugela, and the resistant NIL Tugela DN, was used to  
115 confirm the presence of predicted domains and to search for SNPs between the resistant and  
116 susceptible NILs. No SNPs were identified between the resistant, susceptible, and Chinese  
117 Spring cultivars and all predicted domains from Chinese spring were preserved throughout both  
118 NILs. These predicted and confirmed domains included three N-terminal ankyrin repeats  
119 followed by a CC-NB-LRR architecture with a single C-terminal WRKY domain (Fig. 1A).  
120 The position of the WRKY domain in *5AL-B4* is consistent with the recently postulated NLR-  
121 ID genes. This position is further consistent with the recently characterized function of RRS1  
122 that interacts with PopP2 and AvrRps4 (Le Roux et al. 2015; Sarris et al. 2015).

123

124 *5AL-B4* is regulated during the wheat-*D. noxia* interaction

125 The possible differential regulation of *5AL-B4* in RWA-SA1 infested resistant NIL Tugela DN  
126 and susceptible NIL Tugela was tested using ddPCR. The use of droplet digital PCR (ddPCR)  
127 for transcript level determination was due to the low levels of NLR expression reported  
128 rendering amplification to establish a standard curve for RT-qPCR analysis not consistent. The  
129 low levels of NLR expression is known and hinders expression analysis (du Preez et al. 2008;  
130 Fossdal et al. 2012). Variation was detected in both NILs for the expression of *5AL-B4* from  
131 nine time points (Fig. 2). In the susceptible Tugela, only significant ( $p = 0.023$ ) downregulation  
132 was detected from the early to late time points. Downregulation occurred for 0-4 hpi ( $p = 0.031$ ),  
133 0-48 hpi ( $p = 0.023$ ), 1-48 hpi ( $p = 0.05$ ), 4-48 hpi ( $p = 0.05$ ), and 6-48 hpi ( $p = 0.049$ ). In the  
134 resistant Tugela DN, significant upregulation was detected at the early time points for 0-6 hpi  
135 ( $p = 0.044$ ), 0.5-1 hpi ( $p = 0.036$ ), 0.5-6 hpi ( $p = 0.029$ ), and 0.5-8 hpi ( $p = 0.036$ ). This was  
136 followed by significant downregulation of transcript numbers for 0-24 hpi ( $p = 0.035$ ), 1-24  
137 hpi ( $p = 0.035$ ), 6-24 hpi ( $p = 0.008$ ), 8-24 hpi ( $p = 0.033$ ), and 1-48 hpi ( $p = 0.05$ ).

138

139 A *T. urartu* NLR-ID contributed the core of *5AL-B4*

140 Phylogenetic analysis of the full-length protein sequences closely related to *5AL-B4* revealed  
141 that *T. urartu* TRIUR3\_01726 is the closest relative to *5AL-B4* (Fig. 3). *Triticum urartu* is the  
142 donor of the A-genome in hexaploid wheat. The core sequence of TRIUR3\_01726 served as a  
143 scaffold for the integration of the WRKY domain now present in *5AL-B4* (solid black arrow).  
144 The protogene of *5AL-B4* follows speciation of the pooid, oryzoid and panicoid lineages, across  
145 40 million years, with possible duplication and divergence occurring at each speciation event.  
146 A duplication and divergence event is present where the oryzoid species diverge from panicoid  
147 and pooid species as identified by related genes in *Oryza* species (open grey arrow). Soon after,  
148 the gene in the panicoid and pooid lineages duplicated, diverged and entered the pooid clade,  
149 with *Brachypodium distachyon* occurring basal to the divergence between *Hordeum* and

150 *Triticum* species (open grey arrow). The NLR core continued to duplicate and diversify within  
151 barley and wheat species, with barley occurring basal to each branch, including the branch  
152 containing the *5AL-B4* gene and its homoeologs TRIAE\_CS42\_5B-  
153 AA13L\_TGACv1\_405227\_AA1322580 (*5BL-AA13*) and TRIAE\_CS42\_5D-  
154 AA14L\_TGACv1\_434466\_AA1436530 (*5DL-AA14*) (solid grey arrows). Respectively, *5BL-*  
155 *AA13* and *5DL-AA14* have fused with an Apetala 2 (AP2) and a WRKY-WSKY domain  
156 independently to the *5AL-B4* WRKY fusion. The function of the NLR core in defense response  
157 would seem to have been crucial and therefore maintained within this clade. However, there  
158 must be an advantageous selective pressure that exists on the core NLR recruiting additional  
159 domains, i.e WRKY, WRKY-WSKY, and the AP2 domains. The recruiting of multiple  
160 domains to the core NLR happened independently in the three homoeologous genomes of *T.*  
161 *aestivum* possibly through convergent evolution to increase the relevant function of each  
162 homolog. As these domains all represent transcription factors it is tempting to speculate that  
163 these homoeologs might be guarding transcription factors that are targeted by effectors from  
164 pathogens and pests.

165

166 TaWRKY50, the most likely candidate for *5AL-B4* integration

167 To further understand the integration of a WRKY domain onto the NLR *5AL-B4*, we  
168 investigated the phylogenetic placing of the *5AL-B4* specific WRKY domain. All publically  
169 available *T. aestivum* WRKY domain amino acid sequences were aligned to the WRKY and  
170 WRKY-WSKY domains on the two homoeologs occurring on the 5AL and 5DL chromosomes  
171 (Fig. 4). This analysis indicated that the integrated WRKY domain on the *5DL-AA14* (solid  
172 grey arrow) homoeolog is a perfect match to TaWRKY41. This integration event conforms to  
173 a group I WRKY domain, with two WRKY domains occurring in close proximity of each other.  
174 Thus, the core NLR recruited its WRKY domain from the active transcription factor



175 TaWRKY41. Surprisingly, there is no matching TaWRKY domain that corresponds to the  
176 integration in *5AL-B4* (solid black arrow), with the closest match being TaWRKY50 at 79.7 %  
177 shared homology across the studied 69 amino acids comprising the domain. The WRKY that  
178 was integrated onto *5AL-B4* also originated from group III WRKYs that are characterized by  
179 additional amino acid inclusions and the occurrence of C2HC zinc finger conformation at the  
180 N-terminal end (Eulgem et al. 2000). Interestingly, the two domains on 5DL-AA14 contain the  
181 two group I WRKY with the first being a WRKY motif. However, it also contains the extra  
182 amino acids that are present in the group III WRKYs that results in the grouping of the second  
183 WSKY motif with group III WRKYs.

184

185 Multiple integration events since monocotyledonous divergence

186 It was postulated that the integrated WRKY fusions in monocotyledonous species occurred  
187 prior to the divergence between panicoid, pooid, and oryzoid species and involved a WRKY46  
188 homolog (Sarris et al. 2016). Analysis of the integrated WRKY domains from a representative  
189 number of monocotyledonous NLR-IDs reveals that integration of the WRKY domain is host  
190 and lineage specific (Supplementary Fig. S1). Indeed, the various integration events were not  
191 based on WRKY46 (highlighted) and involves unrelated WRKY homologs. For the majority  
192 of the integration events the NLR-ID WRKY did not diverge extensively from the WRKY that  
193 it could have originated from. However, in the case of *5AL-B4* this is not evident (Fig. 4).  
194 Analysis indicated that the closest WRKY to the one found on *5AL-B4* is TaWRKY50, but  
195 with extensive divergence from the original sequence.

196

197 The effect of *5AL-B4* transcript silencing on aphid and plant performance

198 The role of *5AL-B4* in the wheat-*D. noxia* interaction was further evaluated using barley stripe  
199 mosaic virus (BSMV)-based gene silencing (VIGS). The expression of *5AL-B4* was knocked

200 down in resistant Tugela DN using a unique gene specific sequence following the WRKY  
201 domain. Absolute quantification using ddPCR was used to determine the levels of *5AL-B4*  
202 silencing achieved by VIGS compared to transcript levels in the susceptible and resistant  
203 controls. BSMV treatment reduced the expression levels of *5AL-B4* by 40 % compared to the  
204 uninoculated susceptible and resistant controls (Fig. 5C). Levels of *5AL-B4* were slightly  
205 elevated in the TDN+BSMV<sub>0</sub> treatment, mostly likely due to the stress of viral infection. These  
206 levels of silencing were similar across three replications of the VIGS experiments and similar  
207 to those observed in other VIGS studies for non-NLR targets (Schultz et al. 2015; Senthil-  
208 Kumar and Mysore 2011).

209

210 The reproduction of aphid foundresses in individual clip cages was monitored in order to  
211 determine the effect of silencing *5AL-B4* on *D. noxia* RWASA-1 performance (Table 1, Fig.  
212 5D). The average number of nymphs born per day on TDN+BSMV<sub>5AL-B4</sub> (2.47 nymphs day<sup>-1</sup>)  
213 were similar to the 2.70 nymphs day<sup>-1</sup> on the susceptible Tugela control and were significantly  
214 ( $p = 0.012$ ) more than in the resistant controls Tugela DN (1.71 nymphs day<sup>-1</sup>) and  
215 TDN+BSMV<sub>0</sub> (1.79 nymphs day<sup>-1</sup>). The average total number of nymphs produced can be used  
216 as a measure of aphid fertility (van Eck et al. 2010). This showed that after 16 days of feeding  
217 (21 days post viral infection), a mean total of 22.3 offspring had been produced on  
218 TDN+BSMV<sub>5AL-B4</sub> plants with a similar number of offspring (24.3) observed on Tugela plants.  
219 In contrast, the resistant controls Tugela DN and TDN+BSMV<sub>0</sub>, produced 15.4 and 16.1 mean  
220 total offspring respectively. The intrinsic rate of increase ( $r_m$ ) was used as a measure of aphid  
221 fecundity for the different treatments. The highest calculated rate of increase was observed in  
222 aphids feeding on susceptible Tugela plants (0.302) and aphids feeding on the resistant control  
223 Tugela DN had the lowest rate of increase (0.252). This was not significantly different to the  
224 rate of increase on the TDN+BSMV<sub>0</sub> control (0.258). Aphids feeding on TDN+BSMV<sub>5AL-B4</sub>

225 had a significantly higher rate of increase (0.295) compared to the Tugela DN and  
226 TDN+BSMV<sub>0</sub> controls (p = 0.000011). The prenymphositional period was recorded for all  
227 treatments, however there was no significant difference in the number of days from the birth  
228 of the foundress to the start of her reproduction between the four treatments. The start of  
229 reproduction was on average seven days after the birth of the foundress, which is consistent  
230 with other VIGS studies performed on this interaction (Anderson et al. 2014).

231

232 Silencing of *5AL-B4* in Tugela DN induced phenotypic symptoms similar to the susceptible  
233 Tugela. The observed localized cell death lesions were replaced by yellowing and longitudinal  
234 chlorotic streaking similar to infested susceptible Tugela (Fig. 5A). This indicated that lower  
235 levels of *5AL-B4* resulted in chlorophyll loss similar to when *D. noxia* feeds on susceptible  
236 wheat plants. The above- and belowground plant biomass was monitored to determine the  
237 effects of *5AL-B4* silencing on the health of the plant (Fig. 5E). The above-, belowground, and  
238 total dry weight of TDN+BSMV<sub>5AL-B4</sub> was similar to the susceptible control Tugela, and  
239 significantly less (p = 0.0011) than that of the Tugela DN and TDN+BSMV<sub>0</sub> controls. The  
240 severe reduction of plant biomass following a compatible infestation with *D. noxia* was  
241 consistent with previous reports (Anderson et al. 2008; Mirik et al. 2009). The reduced  
242 accumulation of plant biomass in silenced plants together with an increased *D. noxia*  
243 reproductive ability correlated to an inability by the plant to initiate an antibiotic defense  
244 response characteristic of *DnI* mediated resistance.

245

## 246 **Discussion**

247

248 Here we show that silencing of *5AL-B4* confers a susceptible phenotype to resistant Tugela DN  
249 upon *D. noxia* infestation. This is evident by increased aphid numbers, lowered plant vigor,

250 loss of localized cell death and increased chlorotic streaking. The resistance mechanism in  
251 wheat plants carrying the *Dn1* resistance gene against *D. noxia* has been phenotypically  
252 characterized as antibiosis. This is typified by the host plant reducing aphid fecundity and adult  
253 aphid longevity (Botha et al. 2005). The TDN+BSMV<sub>5AL-B4</sub> plants did not show any alteration  
254 in the prenymphipositional period of the aphids, but an increase in aphid fecundity compared  
255 to resistant controls was evident. *Diuraphis noxia* infestation on susceptible hosts causes the  
256 breakdown of chloroplast and cellular membranes, leading to longitudinal chlorotic streaking  
257 (Botha et al. 2005). In resistant hosts, infestation leads to the development of small necrotic  
258 lesions similar to the localized cell death response observed in the HR (Botha et al. 2006; van  
259 Ooijen et al. 2008). TDN+BSMV<sub>5AL-B4</sub> plants displayed inhibited formation of necrotic lesions  
260 around feeding sites and increased yellowing and extensive chlorotic streaking of the leaves.  
261 Tugela DN plants are known to produce reactive oxygen species (ROS), specifically H<sub>2</sub>O<sub>2</sub>,  
262 which activates downstream defense genes and is known to have a strong signaling and defense  
263 role during an incompatible interaction in plants with antibiotic resistance (Moloi and Van der  
264 Westhuizen 2006; van Eck et al. 2010). The production of H<sub>2</sub>O<sub>2</sub> is also necessary to induce  
265 salicylic acid accumulation via an increase in benzoic acid-2 hydroxylase activity (Léon et al.  
266 1995), a defense mechanism against *D. noxia* in plants that harbor the *Dn1* resistance gene  
267 (Botha et al. 2005). In *Dn7* containing plants, which also confers an antibiotic effect on the  
268 plant, silencing of *phenylalanine ammonia-lyase* (*PAL*) and *WRKY53* disrupted the production  
269 of H<sub>2</sub>O<sub>2</sub>. This led van Eck et al. (2010) to postulate that *PAL* and *WRKY53* function as part of  
270 the defense cascade downstream of *Dn7*. Taken together, these data could indicate that *5AL-*  
271 *B4* functions close to, or possibly at, the molecular recognition of *D. noxia* by plants harboring  
272 the *Dn1* resistance gene.

273

274 WRKY integrated fusions are observed across plant lineages and are considered to represent  
275 recurrent fusions of the WRKY domain in diverse hosts. However, Sarris et al. (2016) suggests  
276 that an ancient fusion event of an AtWRKY46 homolog was integrated into monocotyledonous  
277 species prior to the divergence between wheat, sorghum, barley, and foxtail millet. The  
278 divergence between panicoid species (such as sorghum) and pooid species (such as wheat and  
279 barley) occurred approximately 40 million years ago (Murphy 2011), with the split from  
280 oryzoid species occurring earlier at 50 million years ago (Bossolini et al. 2007). Our  
281 phylogenetic analysis of all the known *T. aestivum* WRKY containing proteins indicated that  
282 the *5AL-B4* integrated WRKY domain is most closely related to TaWRKY50, whilst the C-  
283 terminal WRKY domain present in the homoeolog 5DL-AA14 is identical to TaWRKY41. A  
284 closer inspection of the integrated WRKY domains in other monocotyledonous species clearly  
285 indicated their unrelatedness to AtWRKY46, but that they rather cluster together within the  
286 panicoid, pooid, oryzoid, and dicot lineages (supplementary Fig. 1). This supports the recurrent  
287 integration of different WRKY domains for each lineage rather than a single ancient integration  
288 event prior to the divergence of the monocotyledonous species as previously proposed. The  
289 integration of different WRKY domains onto NLR genes could correlate with the NLR function  
290 with evolutionary pressure driving diversification of the WRKY domain within each host.

291

292 The WRKY integration into the *5DL-AA14* homoeolog is nearly identical to the WRKY  
293 integration in *Aegilops tauschii* and *Hordeum vulgare*, indicating a very well conserved NLR-  
294 ID following their divergence eight million years ago (Middleton et al. 2014). The *5AL-B4*  
295 NLR-ID is comparatively much younger, with its conserved ANK-CC-NLR sequence present  
296 in *T. urartu*. This precursor to *5AL-B4* was conferred to the hexaploid wheat progenitors during  
297 a hybridization event 0.2 – 1.3 million years ago when *T. urartu* hybridized with an unidentified  
298 B genome species to form tetraploid *T. dicoccoides* (Middleton et al. 2014). The WRKY

299 domain was integrated once the complete hexaploid genome was formed approximately 8,000  
300 – 10,000 years ago (Middleton et al. 2014) as it has no close relatives in any of the progenitor  
301 species. Within *T. aestivum* it is assumed to have evolved from a TaWRKY50 protein its closest  
302 relative. It still remains unclear why the *5AL-B4* integrated WRKY has diverged to such an  
303 extent, compared with the highly conserved WRKY domain in its homoeolog 5DL-AA14. We  
304 cannot rule out that the WRKY transcription factor *5AL-B4* recruited its domain from, could  
305 since have been lost from the wheat genome. However, this scenario is highly unlikely as there  
306 is no close homolog other than TaWRKY50 to the integrated WRKY on *5AL-B4* in any of the  
307 wheat progenitors. This would indicate that the WRKY would have had to be born and died  
308 within a very short span of time. Why *5AL-B4* has an evolved WRKY domain that does not  
309 closely match a WRKY transcription factor is under further investigation.

310

311 The role of TaWRKY50 and its nearest homolog in barley (HvWRKY21) is unclear, although  
312 some information is available on a close *Arabidopsis* homolog, AtWRKY41 (81.7 %  
313 homology). AtWRKY41 is a flagellin induced gene involved in the incompatible interaction  
314 between *Arabidopsis* and the biotrophic pathogen *Pseudomonas syringae* pv. *tomato*.  
315 Overexpression of AtWRKY41 increases resistance towards *Pseudomonas* but decreases the  
316 resistance towards the necrotrophic pathogen *Pectobacterium carotovorum* (Higashi et al,  
317 2008). *Pseudomonas syringae* suppresses AtWRKY41 expression through a type III secretion  
318 system effector in compatible interactions (Higashi et al. 2008). Sarris et al. (2016)  
319 subsequently found an NLR-ID with an AtWRKY41 domain that interacts with the effector  
320 AvrRps4 from *Pseudomonas* in a yeast-two hybrid screen. Based on the integration of a similar  
321 domain onto *5AL-B4*, it is conceivable that these two proteins function in a similar manner, and  
322 we propose that *5AL-B4* could be functioning in effector trapping and are currently  
323 investigating this.

324

325 Sarris et al. (2016) found fourteen NLR-IDs occurring as double fusions, where a protein kinase  
326 domain was fused with an additional domain, either sequentially or each domain separated by  
327 the NLR core. The integration of more than one domain onto the NLR-ID may serve to detect  
328 more than a single effector or perhaps one of the two domains may have biochemical activity  
329 while the second domain simply detects the effector. These proteins appear to have developed  
330 from sequential fusion events, as is most probably the case with *5AL-B4*. The closest relative  
331 of *5AL-B4* is an ankyrin repeat domain containing NLR from the wheat “A” genome progenitor  
332 *T. urartu*. Unlike *5AL-B4*, this protein does not contain an integrated WRKY domain and is 94  
333 % homologous to *5AL-B4* if the non-homologous C-terminals following the LRR are not  
334 considered. These two proteins are the only ankyrin repeat domain containing NLRs that have  
335 been identified from extensive database searches. This indicates that a unique fusion event  
336 occurred in *T. urartu* that integrated the ankyrin onto the NLR with subsequent donation to the  
337 *T. aestivum* genome. A second fusion event integrated the WRKY domain onto *5AL-B4* to  
338 create a unique NLR-ID protein within the plant kingdom. Interestingly, the P-loop in the  
339 ancestral form of *5AL-B4* in *T. urartu* is missing (Fig. 1B). The conserved p-loop motif in the  
340 NB-ARC domain regulates nucleotide binding and mutations within this motif abrogate the  
341 ability of the NLR to confer disease resistance or activate the HR (van Ooijen et al. 2008),  
342 which indicates that the ancestral gene may not have been functional and subsequent  
343 reactivation occurred in *5AL-B4*. Additionally, the functionality of the ancestral gene may have  
344 been lost after its donation to *Triticum*.

345

346 The amino-terminal domain of plant NLRs may be involved in both the detection of the  
347 pathogen signal and activation of downstream signaling molecules (DeYoung and Innes 2006;  
348 Collier and Moffett 2009). While the majority of NLR proteins contain a TIR or CC-domain at

349 their N-termini, some proteins have no sequence N-terminal to the NB-ARC domain. A small  
350 number of proteins may have a Solanaceae domain or a BED DNA binding domain replacing  
351 or in conjunction with the CC-domain (Collier and Moffett 2009). Ankyrin repeat domain-  
352 containing proteins constitute one of the largest protein families in all species and plays a role  
353 in protein recognition and binding (Mosavi et al. 2004; Vo et al. 2015). Proteins contain one to  
354 33 repeats, although at least two repeats are necessary in order to assume a folded structure  
355 (Leila et al. 2004). In plants, ankyrin domain-containing proteins are involved in a wide variety  
356 of biological processes with the majority linked to defense responses (Vo et al. 2015).  
357 Observations of ankyrin protein-protein interactions involved in plant defense show that they  
358 bind and perceive effectors in the plasma membrane, cytosolic signal transduction and  
359 activation of nuclear defense gene expression, depending on the subcellular localization signal  
360 of the ankyrin repeat domain-containing protein (Vo et al. 2015). In the case of *5AL-B4*, the  
361 ankyrin repeats may mediate intermolecular interactions, where they bind proteins involved in  
362 the defense gene cascade once the effector has been detected by the WRKY motif and the  
363 receptor has been activated. It can also not be ruled out that they are actively recognizing and  
364 interacting with effectors themselves.

365

366 Sequencing of *5AL-B4* from the resistant and the susceptible lines revealed no SNPs or indels  
367 between them or compared to the cv. Chinese spring that would account for a resistant  
368 genotype. Focusing on the increase in aphid fecundity and absence of H<sub>2</sub>O<sub>2</sub> in TDN+BSMV<sub>5AL-</sub>  
369 *B4* plants, *5AL-B4* plays a role in the defense response of wheat against *D. noxia*, suggesting an  
370 interaction with an unidentified binding partner to form a receptor complex much like  
371 previously reported NLR-ID genes. This binding partner is either absent or mutated in the  
372 susceptible line compared to the resistant line.

373



374 *5AL-B4* contains domains not found in its closest progenitors. This could be the result of  
375 unequal crossing over or gene conversion as seen in other NLR genes that occur as neighbors  
376 at the same locus (Loutre et al. 2011). Thus, these paralogs can serve as sources of variation.  
377 However, like *Lr10* and *RGA2*, *5AL-B4* is a single copy gene that has no closely related NLR  
378 genes at its locus leaving it without access to variation generation due to crossing over with  
379 other paralogs. As no other close relative of the WRKY domain, with TaWRKY50 being the  
380 closest, was identified in the wheat genome it is not clear where the WRKY domain originated.  
381 It could be a result of gene conversion and allelic recombination between ancient haplotypes  
382 or that divergence of the close relatives preceded duplication (du Preez et al. 2008) and this  
383 would be in accordance with loss of genes after genome duplication events as observed in  
384 polyploids (Blanc and Wolf 2004). A counter argument to this would be that the short timespan  
385 might not have allowed for this to have occurred.

386

387 This is the first report of a WRKY containing NLR-ID protein that functions during a plant-  
388 pest interaction. The role of *5AL-B4* in this defense response is intriguing as it is not the *Dn1*  
389 gene, but could well be interacting with it directly. The *Dn1* gene was mapped to a different  
390 portion of the genome and Tugela and Chinese Spring do not have *D. noxia* resistance.  
391 Furthermore, there are no SNPs evident between the two alleles in Tugela and Tugela DN or  
392 between them and Chinese Spring. Thus, we postulate that *5AL-B4* is a NLR-ID protein that is  
393 needed to dimerize with *Dn1* to facilitate resistance in Tugela DN and propose the name  
394 *Associated with Dn resistance 1 (Adr1)* to reflect the loss of *Dn1* resistance once it has been  
395 silenced. Additionally, silencing of the WRKY-containing *5AL-B4* and WRKY53 (van Eck et  
396 al. 2010) might be indicative that *D. noxia* has developed analogous effectors to  
397 phytopathogens that target the evolutionary conserved WRKY transcription factors functioning  
398 in innate immunity.

399

## 400 **Materials and Methods**

401

### 402 Plant and insect growth conditions

403 All experiments were performed using two near isogenic wheat lines (NILs), Tugela  
404 (RWASA1 susceptible) and Tugela DN (PI 137739 – *Dn1*, RWASA1 resistant) that were  
405 obtained from the Agricultural Research Council - Small Grain Institute (ARC-SGI,  
406 Bethlehem, South Africa). The resistant Tugela DN was created by back-crossing the *Dn1*-  
407 gene from SA1684 into Tugela. This gene has been mapped to the 7DS chromosome in Tugela  
408 DN (Bierman 2015). The plants were grown to the two-leaf stage (Zadoks stage 12) under  
409 controlled conditions at 18 °C with a 12 h photoperiod for approximately fourteen days after  
410 germination for all experimental procedures. The RWASA1 aphids were obtained from the  
411 ARC-SGI and maintained on commercially available susceptible PAN3434 wheat plants  
412 (Pannar Seeds, Greytown, South Africa) under controlled conditions at 18 °C with 12 h  
413 photoperiods before use. The three repetitions of barley stripe mosaic virus (BSMV)  
414 inoculations were performed on 14 plants per treatment, with uninoculated Tugela and Tugela  
415 DN used as the susceptible and resistant controls respectively.

416

### 417 Sequence and phylogenetic analyses

418 TRIAE\_CS42\_5AL\_TGACv1\_374266\_AA1195550 (November 2014 *T. aestivum* Ensemble  
419 release; designated *5AL-B4* from here) is an NLR with similar architecture to NLR-ID decoys  
420 against pathogen effectors. It shared homology with *Pi36* that was identified as a target for  
421 differentially regulated miRNA from the study of Nicolis et al. (2017) and identified as a  
422 possible role player in the wheat-*D. noxia* interaction. This, coupled with its unique  
423 architecture, prompted us to further its role in the wheat-*D. noxia* interaction. The full length

424 of the gene was amplified from both NILs using cDNA and cloned into pGEM-T Easy  
425 (Promega) for sequence analysis. The amplification was performed using 250 nM of each of  
426 three primer sets (Set1-F: 5'-CCGGAAATGTTGCCCTTGTG-3'; Set1-R: 5'-  
427 CATAGCACGGTCTTCCGCTCTC-3'; Set2-F: 5'-GCCACGTCCACATGCTTCCTAG-3';  
428 Set2-R: 5'-GACGAACCTTGTCTGCGAGTG-3'; Set3-F: 5'-  
429 TCCTGCACACTGCATCACATGG-3'; Set3-R: 5'-ACGCGCTGACATCAAATTCG-3')

430 that spanned the length of the gene using KAPA HiFi HotStart (KAPA Biosystems). The  
431 sequences for both NILs were generated and aligned to  
432 TRIAE\_CS42\_5AL\_TGACv1\_374266\_AA1195550 to identify polymorphisms. Sequences  
433 downloaded from Ensemble were aligned using MAFFT and a phylogenetic analysis was  
434 performed using maximum parsimony analysis with PAUP\* version 4b10 (Swofford et al.  
435 2002). A maximum likelihood analysis was performed using PhyML to ascertain the placing  
436 of *5AL-B4* using standard parameters and set to determine the best fit model. Bootstrap support  
437 (1,000 replicates) were determined for the tree's branching points. The consistency and  
438 retention indices were determined for all the datasets. Full-length sequences were used to  
439 determine the placing of *5AL-B4* and only the WRKY domains were considered to identify the  
440 closest WRKY relative of *5AL-B4*.

441

#### 442 Expression analyses

443 Confirmation of the differential regulation for *5AL-B4* in the wheat-*D. noxia* interaction was  
444 established using droplet digital (ddPCR). The expression for *5AL-B4* was studied at nine time  
445 points (0, 0.5, 1, 2, 4, 6, 8, 24, 48 hpi) in both NILs. Each plant was infested with 20 aphids,  
446 allowed free movement, and non-infested controls were included as reference points for gene  
447 expression. RNA was extracted from five wheat plants per treatment for three biological  
448 repeats using the Plant RNeasy Mini extraction kit (Qiagen). The RNA from the five

449 extractions per sample were mixed in equimolar concentrations and a total of 1 µg RNA was  
450 converted into cDNA using iScript (Bio-Rad) and used at a 1:19 dilution as template in a  
451 ddPCR reaction containing 2X QX200 ddPCR EvaGreen Supermix (Bio-Rad) and 200 nM of  
452 primer B4-F (5'-TCCTGCACACTGCATCACATGG-3') and B4-R (5'-  
453 GACGAACCTTGTCTGCGAGTG-3'). Reaction droplets were generated in a QX200 Droplet  
454 generator (Bio-Rad) using a DG8 cartridge and the PCR was performed on a T100 thermal  
455 cycler (Bio-Rad) using a ramp rate of 2 °C s<sup>-1</sup> and enzyme activation step at 95 °C for 5 min.  
456 This was followed by 40 cycles of 95 °C for 30 s and 60 °C for 1 min. A final signal stabilization  
457 step of 4 °C for 5 min followed by 90 °C for 5 min was performed. Data acquisition was  
458 performed on a QX200 droplet reader and data analyzed using QuantaSoft Software (Bio-Rad).  
459

#### 460 Virus induced gene silencing of *5AL-B4*

461 The sequence following the WRKY domain in *5AL-B4* is unique. An across-species and wheat  
462 specific BLASTn revealed no potential silencing of non-target transcripts. From this unique  
463 sequence a 270 bp fragment was amplified from cDNA using the VIGS-F (5'-  
464 ACACGTGCTTGGACTCTGTC-3') and VIGS-R (5'-CGAATTTGATGTCAGCGCGT-3')  
465 primers. The fragment was amplified using KAPA HiFi HotStart ReadyMix, cloned into the  
466 pSL038-1 vector and verified through sequencing. The construction of the BSMV silencing  
467 vector and method of viral inoculation followed the protocol by Scofield et al. (2005). Viral  
468 controls included BSMV<sub>0</sub>, which is derived from the empty pSL038-1 vector, and BSMV<sub>PDS</sub>  
469 that included a transcript that targets the *phytoene desaturase* gene and acts as a visual marker  
470 of correct viral reconstitution. Both Tugela and Tugela DN plants were treated with the virus  
471 constructs to ascertain the effect of silencing *5AL-B4* on both NILs. Five days after viral  
472 inoculation, the plants were mass infested with 10 *D. noxia* apterous adults. Additionally, a  
473 single apterous aphid was placed inside a clip cage attached to the emergent third leaf to

474 determine the fecundity of the aphids feeding on the different silenced plants. The following  
475 day, all aphids apart from one new born nymph were removed from the cage. The remaining  
476 new born was regarded as the foundress and nymphs born to this foundress were counted and  
477 removed every 24 h for 14 days. The intrinsic rate of increase ( $r_m$ ) for each foundress was  
478 estimated according to the equation  $r_m = (0.738 \times \ln(M_d))/d$ , where  $M_d$  is the number of  
479 nymphs produced in a period equal to the prereproductive time (d) (Wyatt and White 1971).  
480 To determine the integrity of the antibiosis defense mechanism in *Dn1* carrying Tugela DN,  
481 the effects of aphid feeding on plant biomass accumulation was assessed. Six days after mass  
482 aphid infestation (eleven days after viral inoculation), aphids were removed from the third leaf  
483 of three experimental plants per treatment and the leaf tissue collected into liquid nitrogen and  
484 stored at  $-80^\circ\text{C}$  prior to extraction. RNA was extracted from each individual leaf sample by  
485 homogenization in liquid nitrogen followed by purification with the RNeasy plant mini kit.  
486 Droplet digital PCR was used for absolute quantification of *5AL-B4* transcript levels in VIGS  
487 treated plants as described previously. Twenty one days after viral inoculation, all aphids were  
488 removed from three plants per treatment and the aboveground plant biomass was separated  
489 from the roots. The roots were rinsed and together with the aboveground plant biomass dried  
490 for 48 h at  $40^\circ\text{C}$  and their weight determined.

491

## 492 **Acknowledgments**

493 The authors would like to thank A Jacobs for assistance with the phylogenetic analyses and  
494 critical discussion on the manuscript; and, Bio-Rad for the use of the QX200 machine to  
495 quantify transcript abundance. This work was funded by public grants from the Winter Cereal  
496 Trust (WCT/W/2007/04 Induced systemic resistance in wheat) and the National Research  
497 Foundation Technology and Human Resources for Industry Programme (TP2009072000010  
498 and TP2011070700029).

499

500 **Author contributions**

501 VFN and EV contributed equally to the research design, data analyses, and preparation of the  
502 manuscript. Research funding was obtained by EV.

503

504 **Literature cited**

505 Anderson, V. A., Haley, S. D., Peairs, F. B., van Eck, L., Leach, J. E., and Lapitan, N. L. 2014.  
506 Virus-induced gene silencing suggests (1,3;1,4)-beta-glucanase is a susceptibility factor in the  
507 compatible Russian wheat aphid-wheat interaction. *Mol. Plant-Microbe Interact.* 27: 913-922.

508

509 Ashikawa, I., Hayashi, N., Yamane, H., Kanamori, H., Wu, J., Matsumoto, T., Ono, K., and  
510 Yano, M. 2008. Two adjacent nucleotide-binding site-leucine-rich repeat class genes are  
511 required to confer *Pikm*-specific rice blast resistance. *Genetics.* 180: 2267-2276.

512

513 Bierman, A. 2015. Mapping and survey sequencing of *Dn* resistance genes in *Triticum*  
514 *aestivum* L. Ph.D.thesis. University of Stellenbosch, Stellenbosch, South Africa.

515

516 Blanc, G., and Wolfe, K. H. 2004. Widespread paleopolyploidy in model plant species inferred  
517 from age distributions of duplicate genes. *Plant Cell.* 16: 1667-1678.

518

519 Bos, J. I., Prince, D., Pitino, M., Maffei, M. E., Win, J., and Hogenhout, S. A. 2010. A  
520 functional genomics approach identifies candidate effectors from the aphid species *Myzus*  
521 *persicae* (green peach aphid). *PLoS Genet.* 6: e1001216.

522

- 523 Bossolini, E., Wicker, T., Knobel, P. A., and Keller, B. 2007. Comparison of orthologous loci  
524 from small grass genomes *Brachypodium* and rice: implications for wheat genomics and grass  
525 genome annotation. *Plant J.* 49: 704-717.
- 526
- 527 Botha, A.-M., Lacock, L., van Niekerk, C., Matsioloko, M. T., du Preez, F. B., Loots, S.,  
528 Venter, E., Kunert, K. J., and Cullis, C. A. 2006. Is photosynthetic transcriptional regulation in  
529 *Triticum aestivum* L. cv. 'TugelaDN' a contributing factor for tolerance to *Diuraphis noxia*  
530 (Homoptera: Aphididae)? *Plant Cell Rep.* 25: 41-54.
- 531
- 532 Botha, A.-M., Li, Y., and Lapitan, N. L. V. 2005. Cereal host interactions with Russian wheat  
533 aphid: A review. *J. Plant Interac.* 1: 211-222.
- 534
- 535 Botha, A.-M., van Eck, L., Burger, N. F. V., and Swanevelder, Z. H. 2014. Near-isogenic lines  
536 of *Triticum aestivum* with distinct modes of resistance exhibit dissimilar transcriptional  
537 regulation during *Diuraphis noxia* feeding. *Biol. Open* 3: 1116-1126.
- 538
- 539 Collier, S. M., and Moffett, P. 2009. NB-LRRs work a "bait and switch" on pathogens. *Trends*  
540 *Plant Sci.* 14: 521-529.
- 541
- 542 DeYoung, B. J., and Innes, R. W. 2006. Plant NBS-LRR proteins in pathogen sensing and host  
543 defense. *Nat. Immunol.* 7: 1243-1249.
- 544
- 545 du Preez, F. B., Myburg, A. A., Venter, E., and Botha, A.-M. 2008. Resistance genes in the  
546 Triticeae and the dynamics of divergence before duplication. *S. Afr. J. Bot.* 74: 51-64.
- 547

- 548 Eulgem, T., Rushton, P. J., Robatzek, S., and Somssich, I. E. 2000. The WRKY superfamily  
549 of plant transcription factors. *Trends Plant Sci.* 5: 199-206.
- 550
- 551 Fossdal, C. G., Yaqoob, N., Krokene, P., Kvaalen, H., Solheim, H., and Yakovlev, I. A. 2012.  
552 Local and systemic changes in expression of resistance genes, NB-LRR genes and their  
553 putative microRNAs in Norway spruce after wounding and inoculation with the pathogen  
554 *Ceratocystis polonica*. *BMC Plant Biology.* 12: 105.
- 555
- 556 Higashi, K., Ishiga, Y., Inagaki, Y., Toyoda, K., Shiraishi, T., and Ichinose, Y. 2008.  
557 Modulation of defense signal transduction by flagellin-induced WRKY41 transcription factor  
558 in *Arabidopsis thaliana*. *Mol. Genet. Genomics.* 279: 303-312.
- 559
- 560 Jankielsohn, A. 2013. Host associations of *Diuraphis noxia* (Homoptera: Aphididae) biotypes  
561 in South Africa. *J. Econ. Entomol.* 106: 2595-2601.
- 562
- 563 Jankielsohn, A. 2016. Changes in the Russian wheat aphid (Hemiptera: Aphididae) biotype  
564 complex in South Africa. *J. Econ. Entomol.* 109: 907-912.
- 565
- 566 Lapitan, N. L., Li, Y.C., Peng, J., and Botha, A.-M. 2007. Fractionated extracts of Russian  
567 wheat aphid eliciting defense responses in wheat. *J. Econ. Entomol.* 100: 990-999.
- 568
- 569 Le Roux, C., Huet, G., Jauneau, A., Camborde, L., Tremousaygue, D., Kraut, A., Zhou, B.,  
570 Levailant, M., Adachi, H., Yoshioka, H., Raffaele, S., Berthomé, R., Couté, Y., Parker, J. E.,  
571 and Deslandes, L. 2015. A receptor pair with an integrated decoy converts pathogen disabling  
572 of transcription factors to immunity. *Cell* 161: 1074-1088.



573

574 Léon, J., Shulaev, V., Yalpani, N., Lawton, M. A., and Raskin, I. 1995. Benzoic acid 2-  
575 hydroxylase, a soluble oxygenase from tobacco, catalyzes salicylic acid biosynthesis. Proc.  
576 Natl. Acad. Sci. U. S. A. 92: 10413-10417.

577

578 Loutre, C., Wicker, T., Travella, S., Galli, P., Scofield, S., Fahima, T., Feuillet, C., and Keller,  
579 B. 2009. Two different CC-NBS-LRR genes are required for *Lr10*-mediated leaf rust resistance  
580 in tetraploid and hexaploid wheat. Plant J. 60: 1043-1054.

581

582 Middleton, C. P., Senerchia, N., Stein, N., Akhunov, E. D., Keller, B., Wicker, T., and Kilian,  
583 B. 2014. Sequencing of chloroplast genomes from wheat, barley, rye and their relatives  
584 provides a detailed insight into the evolution of the Triticeae tribe. PLoS One 9: e85761.

585

586 Mirik, M., Ansley, J., Michels, J., and Elliott, N. 2009. Grain and vegetative biomass reduction  
587 by the Russian wheat aphid in winter wheat. Southwest Entomol. 34: 131-139.

588

589 Moloi, M. J., and van der Westhuizen, A.J. 2006. The reactive oxygen species are involved in  
590 resistance responses of wheat to the Russian wheat aphid. J. Plant Physiol. 163: 1118-1125.

591

592 Morrison, W. P., and Peairs, F. B. 1998. Response model concept and economic impact. Pages  
593 1-11 in: A response model for and introduced pest – the Russian wheat aphid. S. S.  
594 Quisenberry, and F. B. Peairs, eds. Thomas Say publications in entomology. Entomological  
595 Society of America, Lanham.

596

- 597 Mosavi, L. K., Cammett, T. J., Desrosiers, D. C., and Peng, Z. Y. 2004. The ankyrin repeat as  
598 molecular architecture for protein recognition. *Protein Sci.* 13: 1435-1448.  
599
- 600 Murphy, D. 2011. *Plants, biotechnology and agriculture*. CABI.  
601
- 602 Nicolis, V. F., Greyling, S.-M., and Venter, E. 2017. Isolation of early-responsive microRNA  
603 from *Diuraphis noxia* (Hemiptera: Aphididae)-resistant wheat. *J. Econ. Entomol.* 110: 1298-  
604 1306.  
605
- 606 Nirmala, J., Drader, T., Chen, X., Steffenson, B., and Kleinhofs, A. 2010. Stem rust spores  
607 elicit rapid RPG1 phosphorylation. *Mol. Plant-Microbe Interact.* 23: 1635-1642.  
608
- 609 Okuyama, Y., Kanzaki, H., Abe, A., Yoshida, K., Tamiru, M., Saitoh, H., Fujibe, T.,  
610 Matsumura, H., Shenton, M., Clark Galam, D., Undan, J., Ito, A., Sone, T., and Terauchi, R.  
611 2011. A multifaceted genomics approach allows the isolation of the rice *Pia*-blast resistance  
612 gene consisting of two adjacent NBS-LRR protein genes. *Plant J.* 66: 467-479.  
613
- 614 Rodriguez, P. A., and Bos, J.I. 2013. Toward understanding the role of aphid effectors in plant  
615 infestation. *Mol. Plant-Microbe Interact.* 26: 25-30.  
616
- 617 Sarris, P. F., Cevik, V., Dagdas, G., Jones, J. D., and Krasileva, K. V. 2016. Comparative  
618 analysis of plant immune receptor architectures uncovers host proteins likely targeted by  
619 pathogens. *BMC Biol.* 14: 8-016-0228-7.  
620

621 Sarris, P. F., Duxbury, Z., Huh, S. U., Ma, Y., Segonzac, C., Sklenar, J., Derbyshire, P., Cevik,  
622 V., Rallapalli, G., Saucet, S. B., Wirthmueller, L., Menke, F. L. H., Sohn, K. H., and Jones, J.  
623 D. G. 2015. A plant immune receptor detects pathogen effectors that target WRKY  
624 transcription factors. *Cell* 161: 1089-1100.

625

626 Scofield, S. R., Huang, L., Brandt, A. S., and Gill, B. S. 2005. Development of a virus-induced  
627 gene-silencing system for hexaploid wheat and its use in functional analysis of the *Lr21*-  
628 mediated leaf rust resistance pathway. *Plant Physiol.* 138: 2165-2173.

629

630 Schultz, T., van Eck, L., and Botha, A.-M. 2015. Phi-class glutathione-S-transferase is involved  
631 in *Dn1*-mediated resistance. *Physiol. Plant.* 154: 1-12.

632

633 Senthil-Kumar, M., and Mysore, K. S. 2011. Virus-induced gene silencing can persist for more  
634 than two years and also be transmitted to progeny seedlings in *Nicotiana benthamiana* and  
635 tomato. *Plant Biotechnol. J.* 9: 797-806.

636

637 Sinapidou, E., Williams, K., Nott, L., Bahkt, S., Tor, M., Crute, I., Bittner-Eddy, P., and  
638 Beynon, J. 2004. Two TIR:NB:LRR genes are required to specify resistance to *Peronospora*  
639 *parasitica* isolate Cala2 in Arabidopsis. *Plant J.* 38: 898-909.

640

641 Smith, C. M., Liu, X., Wang, L. J., Liu, X., Chen, M. S., Starkey, S., and Bai, J. 2010. Aphid  
642 feeding activates expression of a transcriptome of oxylipin-based defense signals in wheat  
643 involved in resistance to herbivory. *J. Chem. Ecol.* 36: 260-276.

644

- 645 Smith, C. M., Schotzko, D. J., Zemetra, R. S., and Souza, E. J. 1992. Categories of resistance  
646 in plant introductions of wheat resistant to the Russian wheat aphid (Homoptera: Aphididae).  
647 J. Econ. Entomol. 85: 1480-1484.  
648
- 649 Swofford, D. L. 2002. Phylogenetic analysis using parsimony (\* and other methods). Version  
650 4. Sunderland, MA: Sinauer Associates.  
651
- 652 van Eck, L., Schultz, T., Leach, J. E., Scofield, S. R., Peairs, F. B., Botha, A.-M., and Lapitan,  
653 N. L. V. 2010. Virus-induced gene silencing of WRKY53 and an inducible *phenylalanine*  
654 *ammonia-lyase* in wheat reduces aphid resistance. Plant Biotechnol. J. 8:1023-1032.  
655
- 656 van Ooijen, G., Mayr, G., Kasiem, M. M. A., Albrecht, M., Cornelissen, B. J. C., and Takken,  
657 F. L. W. 2008. Structure–function analysis of the NB-ARC domain of plant disease resistance  
658 proteins. J. Exp. Bot. 59: 1383-1397.  
659
- 660 Vo, K. T. X., Kim, C. Y., Chandran, A. K. N., Jung, K. H., An, G., and Jeon, J. S. 2015.  
661 Molecular insights into the function of ankyrin proteins in plants. J. Plant Biol. 58: 271-284.  
662
- 663 Wang, X., Richards, J., Gross, T., Druka, A., Kleinhofs, A., Steffenson, B., Acevede, M, and  
664 Brueggeman, R. 2013. The *rpg4*-mediated resistance to wheat stem rust (*Puccinia graminis*)  
665 in barley (*Hordeum vulgare*) requires *Rpg5*, a second NBS-LRR gene, and an actin  
666 depolymerization factor. Mol. Plant-Microbe Interact. 26: 407-418.  
667
- 668 Will, T., Tjallingii, W. F., Thönnessonn, A., and van Bel A. J. E. 2007. Molecular sabotage of  
669 plant defense by aphid saliva. Proc. Natl. Acad. Sci. U. S. A. 104: 10536-10541.

670

671 Wyatt, I. J., and White, P.F. 1977. Simple estimation of intrinsic increase rates for aphids and

672 tetranychid mites. *J. Appl. Ecol.* 14: 757-766.

673 **Table 1.** Aphid fecundity on silenced and control plants. Plants treated with BSMV<sub>5AL-B4</sub> had a  
674 similar mean aphid production rate and aphid fecundity to the susceptible control, and  
675 significantly more than the resistant controls. No difference was observed in the  
676 prenymphipositional period for each treatment. Different letters per column indicate statistical  
677 significance between values listed in that column.  
678

| Treatment                  | Mean births day <sup>-1</sup> | r <sub>m</sub> | Prenymphipositional period (days) |
|----------------------------|-------------------------------|----------------|-----------------------------------|
| Tugela                     | 2.70a                         | 0.303+0.021a   | 7.5+0.5a                          |
| TDN+BSMV <sub>0</sub>      | 1.79b                         | 0.258+0.013b   | 7.6+0.5a                          |
| Tugela DN                  | 1.71b                         | 0.252+0.012b   | 7.8+0.4a                          |
| TDN+BSMV <sub>5AL-B4</sub> | 2.47a                         | 0.295+0.02a    | 7.4+0.5a                          |

679

680 **Figure captions**

681 **Fig. 1.** Structure of *5AL-B4*. **A**, *5AL-B4* encodes seven exons and six introns with the predicted  
682 untranslated regions (empty boxes), ankyrin, NB-ARC, LRR, and WRKY domains indicated.  
683 **B**, Sequence alignment between *5AL-B4* and ancestral copy in *T. urartu* indicating sequence  
684 dissimilarity around the P-loop.

685

686 **Fig. 2.** Differential expression of *5AL-B4* transcripts between Tugela (white bars) and Tugela  
687 DN (grey bars) NILs. Significant downregulation of transcript levels in the susceptible NIL  
688 Tugela was detected from the early to late time points (4-48 hpi,  $p \leq 0.05$ ). In the resistant NIL  
689 Tugela DN, significant upregulation from the early to intermediary (0-8 hpi,  $p \leq 0.05$ ) time  
690 points was detected, followed by significant downregulation at 24 and 48 hpi ( $p \leq 0.05$ ).

691

692 **Fig. 3.** Phylogenetic analysis indicated that the ANK-domain containing core sequence of *T.*  
693 *urartu* TRIUR3\_01726 served as a scaffold for the integration of the WRKY domain of *5AL-*  
694 *B4*. The most parsimonious tree is presented with a consistency index of 0.7189 and retention  
695 index of 0.7841. Bootstrap values (1,000 repetitions) above 70 % are indicated. Solid black  
696 arrow indicates *5AL-B4*, solid grey arrows indicate the two homoeologs *5BL-AA13* and *5DL-*  
697 *AA14*. The split between the *Triticum*, *Hordeum* and *Oryzae* clades are indicated with open  
698 grey arrows.

699

700 **Fig. 4.** *Triticum aestivum* WRKY-domain containing sequences. The most likely candidate  
701 WRKY domain that was integrated into *5AL-B4* is TaWRKY50. Multiple WRKY-domain  
702 integrations, spanning all the sub-groups, are evident in contrast to the proposed ancient  
703 integration of AtWRKY46. The most parsimonious tree is presented with a consistency index  
704 of 0.5530 and retention index of 0.8530. Bootstrap values (1,000 repetitions, > 70 %) above

705 branches for parsimony analysis and below for maximum likelihood analysis. Best maximum  
706 likelihood model fit DCMut +F. Solid black arrow indicates *5AL-B4*, solid grey arrow indicate  
707 the WRKY-containing homoeolog *5DL-AA14*.

708

709 **Fig. 5.** Plant and aphid phenotypic responses to BSMV-mediated VIGS of *5AL-B4*. **A,**  
710 Phenotypes of representative plants per treatment 19 days after viral infection. Both resistant  
711 controls (Tugela DN and TugelaDN+BSMV<sub>0</sub>) exhibited localized cell death lesions compared  
712 to the susceptible (Tugela) and Tugela DN+BSMV<sub>5AL</sub> treated plants that exhibited longitudinal  
713 chlorotic streaks characteristic of RWASA-1 infestation on susceptible cultivars. Tugela and  
714 Tugela DN Control represent uninfested plants, and Tugela and Tugela DN infested plants. **B,**  
715 Percentage knock-down of *5AL-B4* measured using ddPCR. **C,** Mean total aphid production of  
716 ten plants per treatment over 16 days. Aphids feeding on Tugela and Tugela DN had the highest  
717 and lowest mean production of nymphs respectively with the number of nymphs produced on  
718 silenced plants comparable to those on susceptible plants. **D,** Individual plant tissues and total  
719 dry plant biomass for each treatment following 16 days of aphid feeding on each treatment.  
720 Resistant controls had significantly higher biomass for all components compared to the  
721 susceptible control and the Tugela DN+BSMV<sub>5AL</sub> treated plants.

722

723

724 **Supplementary Fig. S1.** Phylogenetic analysis of a representative number of WRKY domain  
725 containing NLR-IDs from monocotyledonous species against AtWRKY46. Analysis indicates  
726 that multiple, lineage and host specific WRKY integration events occurred.



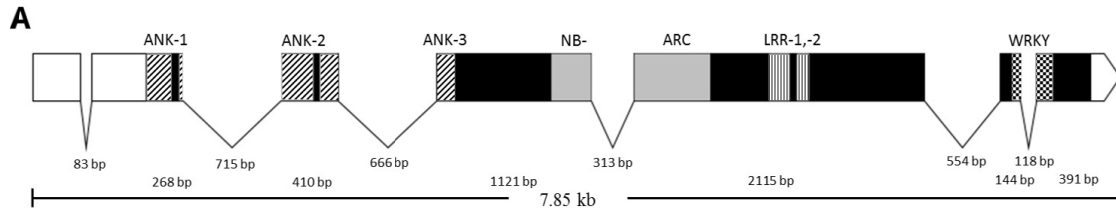

**B**

|                       |                                                                    |     |
|-----------------------|--------------------------------------------------------------------|-----|
| T.aes_5AL_AA1195550.1 | 483 RHDVCFGSWYPTPCGELVGDGHLNLEAWLGKDGEEQLKVVSVVGGGV                | 532 |
| T.ura_TRIUR3_01726-T1 | 501 RHDVCFGSWYPTPCGELVGDGHLNLEAWLGKDGEEQLKVVSVVGGGV                | 550 |
| T.aes_5AL_AA1195550.1 | 533 <u>P-loop</u> GKTTLSELYRRIRGQFECQA FVRTSRKPDIRRLISLSQVRPHQTPHT | 582 |
| T.ura_TRIUR3_01726-T1 | 551 -----VQRYFGGGE-----DLKSLIIFLYAAMLSH-----                       | 575 |
| T.aes_5AL_AA1195550.1 | 583 WKLHSLIADIRTHLHDKRYLIVIDDVWATQTWDIINRALPAGNLCSRLI              | 632 |
| T.ura_TRIUR3_01726-T1 | 576 -----FFFLEVQYLIVIDDVWATQTWDIINRALPAGNLCSRLI                    | 614 |
| T.aes_5AL_AA1195550.1 | 633 TTEVEDVALKCCGYDSRHVLMVKPLGYDSSKLFSTAFGLQYECPELCL               | 682 |
| T.ura_TRIUR3_01726-T1 | 615 TTEVEDVALKCCGYDSRHVLMVKPLGYDSSKLFSTAFGLQYECPELCL               | 664 |

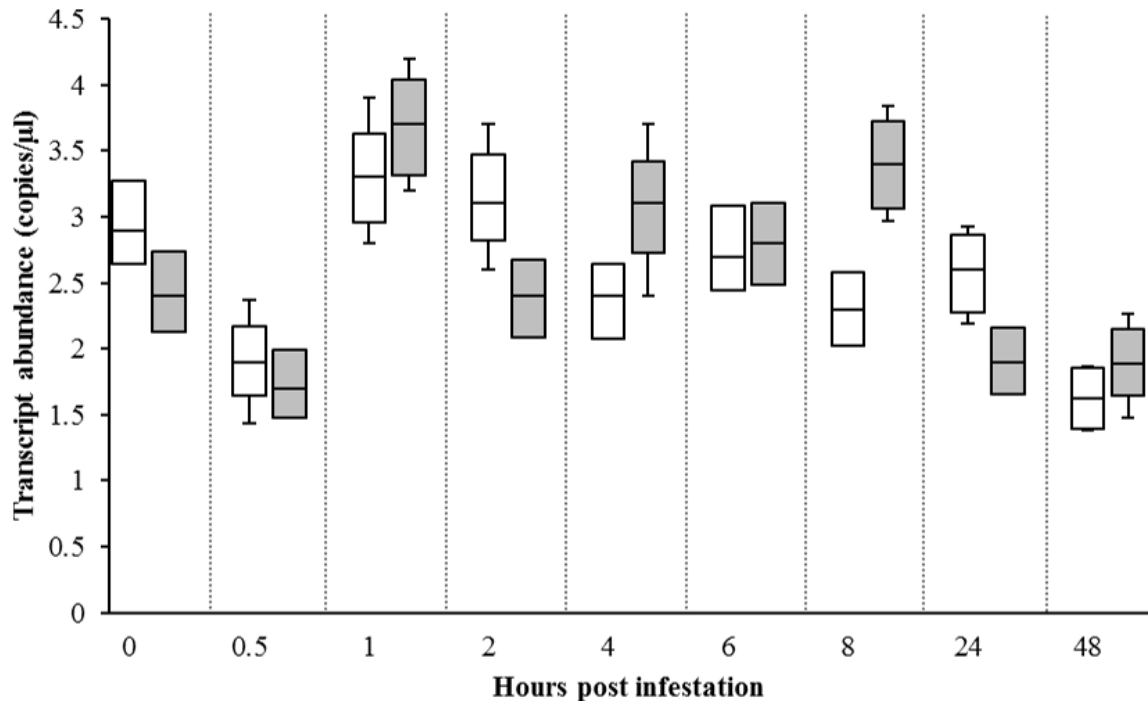

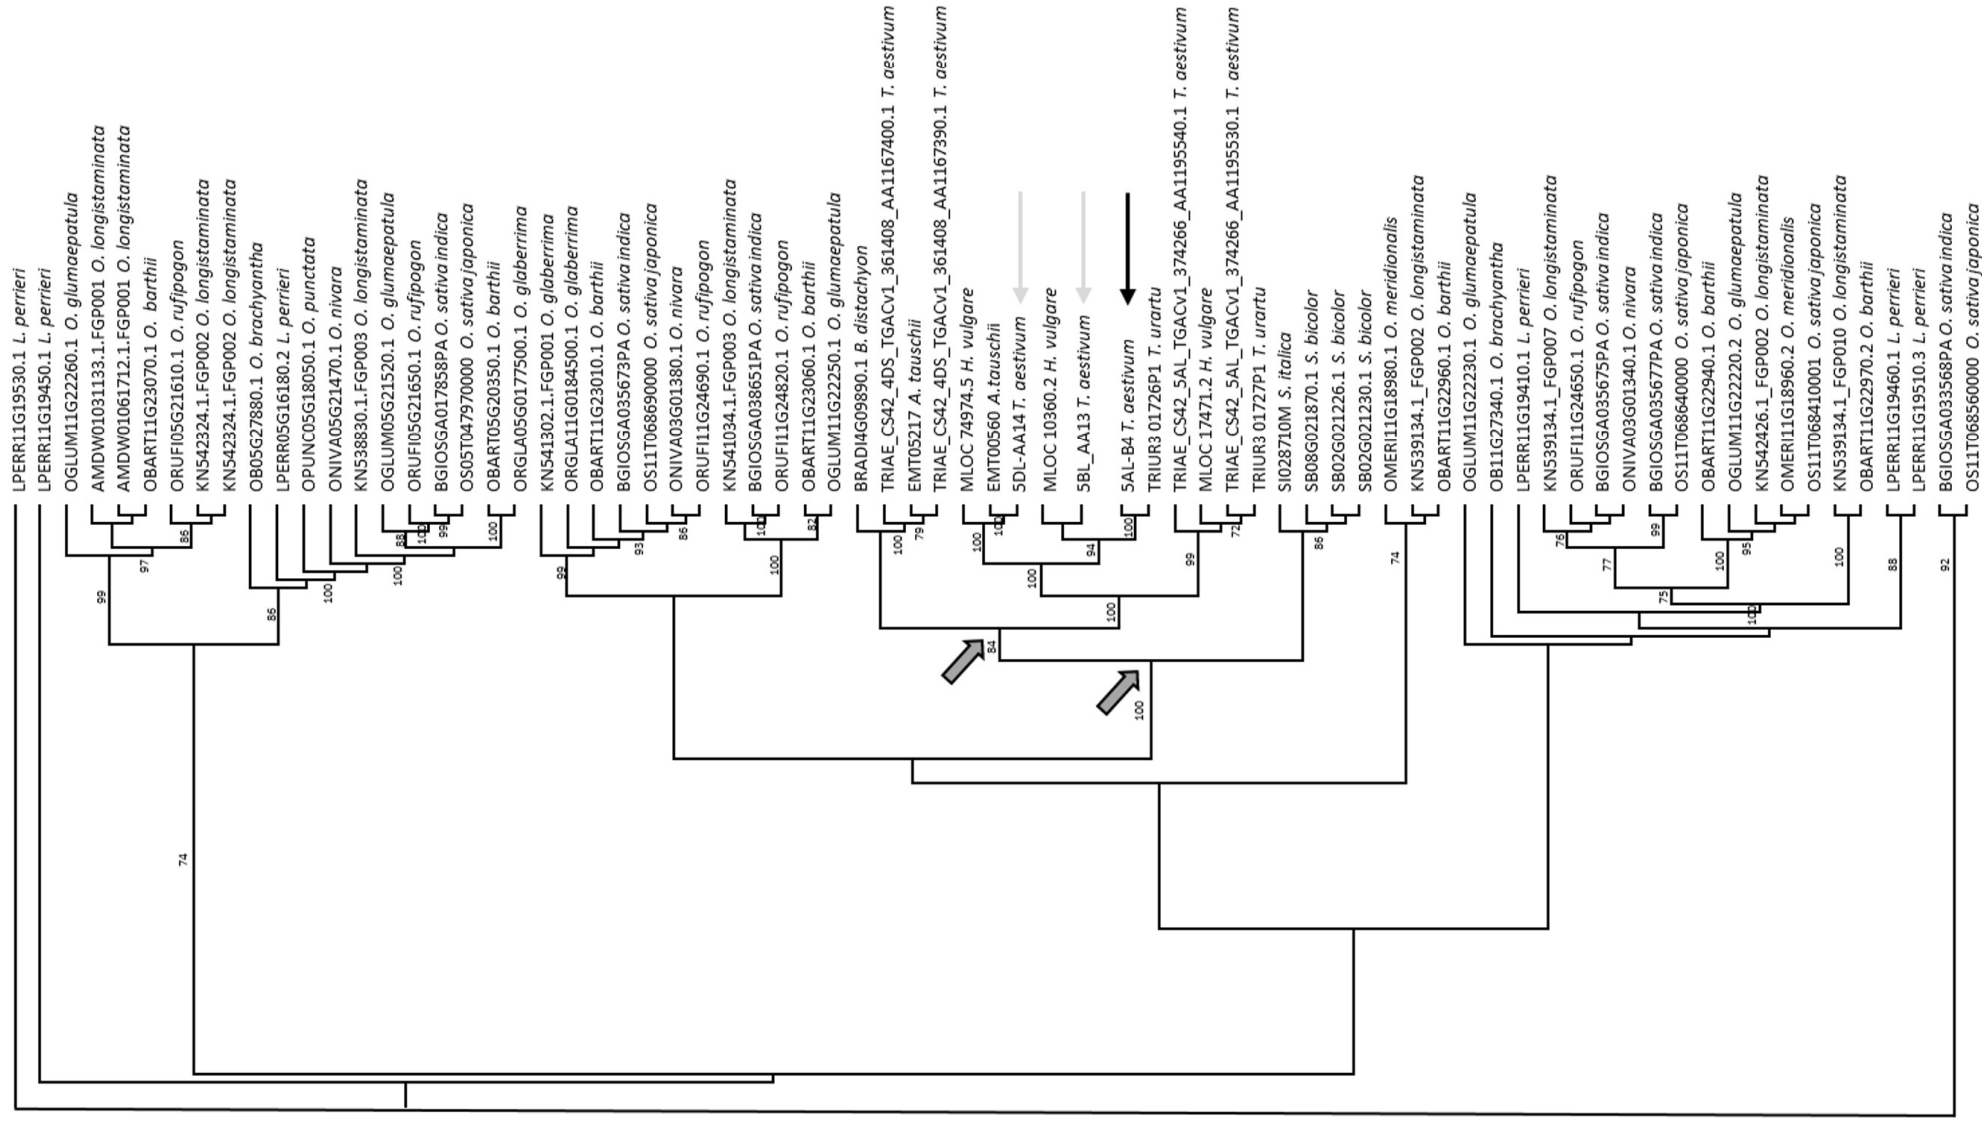

Oryzoid

Pooid

Panicoid

Oryzoid

Group I

WRKY45 ALC04262.1  
 WRKY1 ACD80356.1  
 WRKY17 ACD80361.1  
 AAQ63878.1  
 WRKY78 ADF28625.1  
 WRKY24 ACD80380.1  
 WRKY23 ACD80379.1  
 CDM83596.1  
 WRKY3 ACD80364.1  
 CDM87077.1  
 CDM84965.1  
 WRKY30 ACD80378.1  
 WRKY16 ACD80360.1  
 WRKY8 ACD80369.1  
 669029279

WRKY7 ACD80368.1  
 WRKY27 ACD80363.1  
 WRKY2 ACD80357.1  
 WRKY53 ABN43178.1  
 WRKY53 ABN43185.1  
 WRKY53 AGF90798.1  
 WRKY18 ACD80375.1  
 WRKY14 ACD80359.1  
 WRKY19 ACD80362.1  
 WRKY44 ALC04261.1  
 WRKY22 ACD80376.1  
 WRKY46 ALC04263.1  
 WRKY36 ACD80383.1  
 CDM83382.1  
 CDM82603.1

WRKY72 ABN43184.1  
 WRKY72 ABN43179.1  
 CDM83782.1

WRKY51 ALC04268.1  
 AMK51203.1  
 WRKY52 ALC04269.1  
 AMK51204.1  
 AML47734.1  
 AML47733.1  
 CDM83286.1  
 WRKY10 ABN43182.1  
 WRKY6 ACD80367.1  
 CDM81643.1  
 WRKY10 AIJ50266.1  
 WRKY29 ACD69419.1  
 669028595

WRKY80 AFW98256.1  
 WRKY33 ACD69422.1  
 WRKY4 ACD80365.1  
 WRKY8 ABC61128.1  
 125491381  
 WRKY71 ABN43177.1  
 WRKY48 ALC04265.1  
 WRKY79 AFN44008.1  
 299109314  
 669029839

WRKY13 ABO15543.1  
 669029768  
 WRKY28 ACD69418.1  
 WRKY28 ABC61127.1  
 WRKY51 AFR66647.1  
 WRKY11 AJP7026.1  
 WRKY21 ACD69416.1  
 WRKY20 ACD80377.1  
 125491389  
 WRKY68 ABN43181.1  
 WRKY68 ABO15546.1  
 WRKY53 ALC04270.1  
 WRKY9 ACD80370.1  
 CDM84760.1

WRKY49 ALC04266.1  
 WRKY47 ALC04264.1

5AL-B4  
 WRKY50 ALC04267.1  
 WRKY15 ACD80374.1  
 WRKY19 b ABO15545.1  
 ABN43183.1  
 WRKY19 ABN43183.1  
 WRKY41 ACD69424.1  
 5DL-AA14  
 WRKY5 ACD80366.1  
 ABB90551.1  
 WRKY74 a ABN43180.1  
 WRKY74 b ABO15544.1

WRKY42 ACD80388.1  
 AFM91581.1  
 AFM91580.1  
 WRKY1B ABC65847.1  
 WRKY1A ABC65846.1  
 WRKY11 ACD80372.1  
 WRKY10 ACD80371.1  
 WRKY45 ABO15542.1  
 WRKY1 ALR88710.1  
 WRKY25 ACD80381.1  
 CDM84755.1  
 WRKY31 ACD69420.1  
 CDM84770.1  
 WRKY46 ABN43186.1  
 WRKY13 ACD80358.1  
 AML47735.1  
 WRKY40 ACD80387.1  
 AMK51205.1

Group III

Group II

Group III

89

92

76

86

89

86

96

96

87

100

99

86

89

86

87

98

97

99

78

85

95

99

99

95

97

94

70

100

98

99

97

84

70

85

85

89

100

99

100

99

100

99

98

97

100

96

73

100

99

88

99

100

81

82

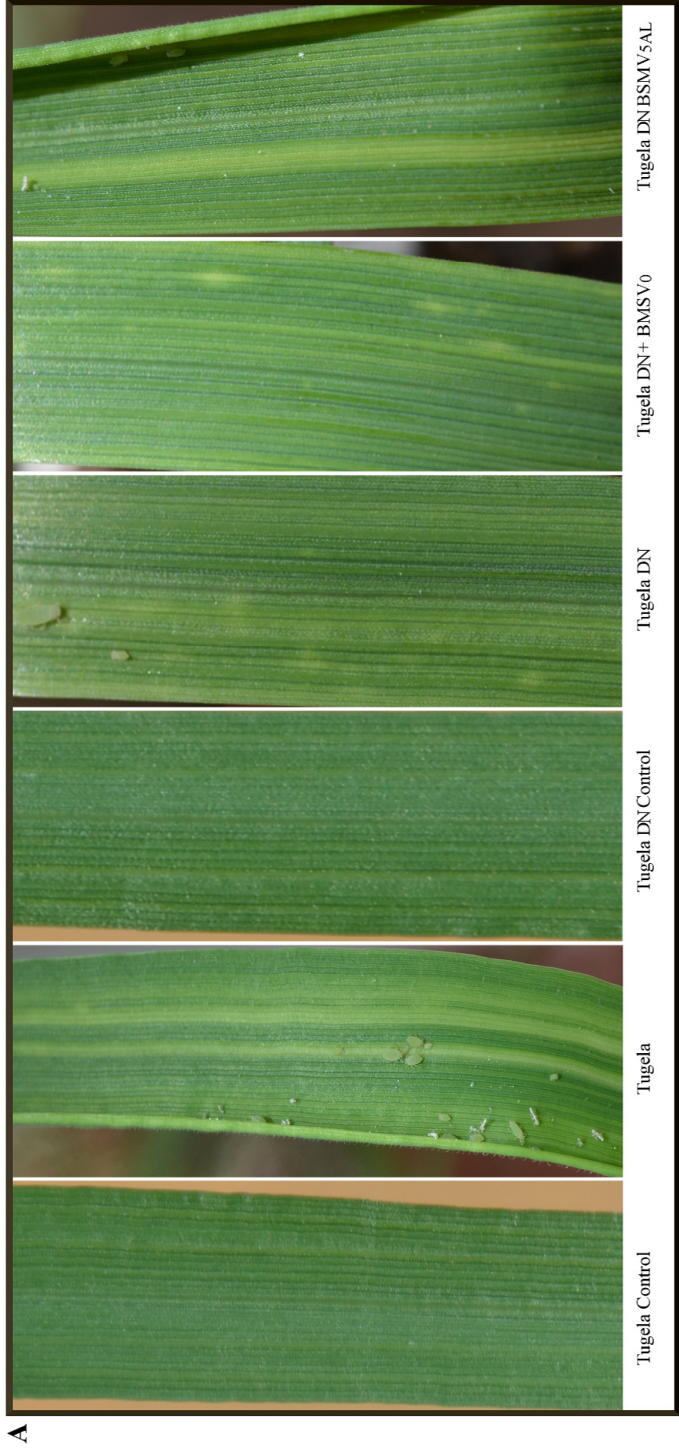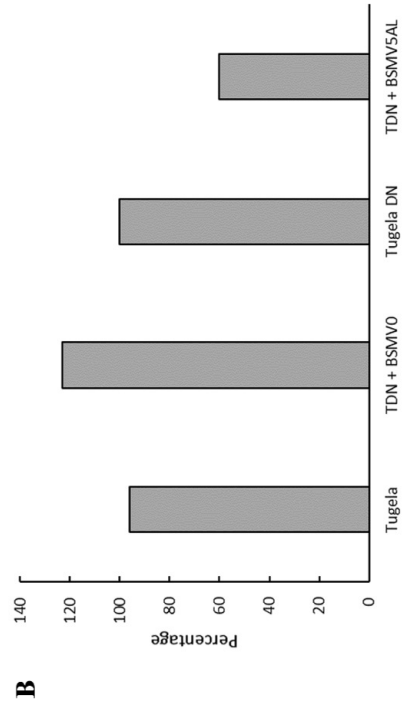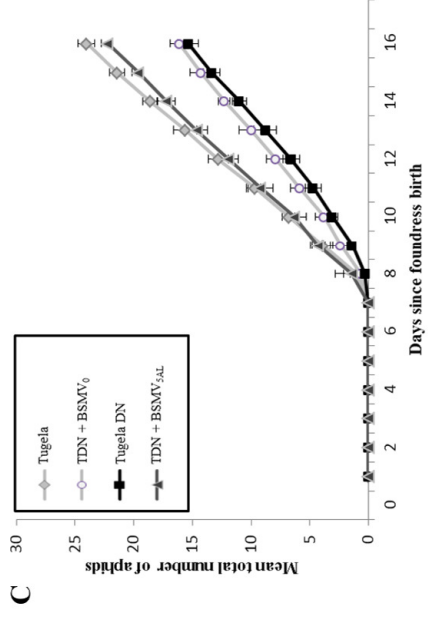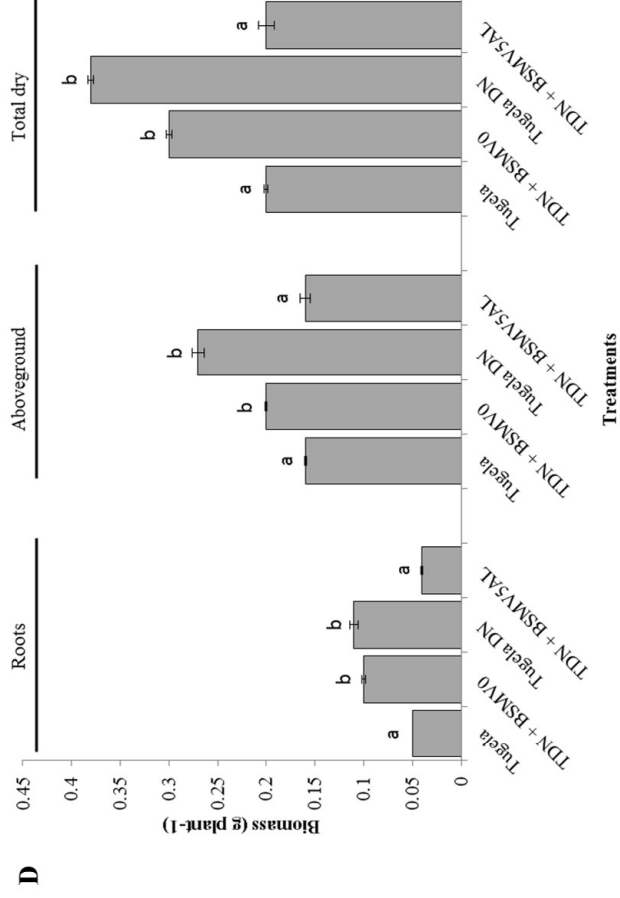

Source: http://biorxiv.org/content/10.1101/261644v2.full.pdf
